# Supplementary material for: The impact of lowbush blueberry (Vaccinium angustifolium Ait.) and cranberry (Vaccinium macrocarpon Ait.) pollination on honey bee (Apis mellifera L.) colony health status
Source: PubMed Central journal article supplement (PMC6980599; doi:10.1371/journal.pone.0227970), 2020-01-24
Supplement: pone.0227970.s002.pdf [file pone.0227970.s002.pdf]

| Colony # | Management Strategies (MS) | Acute bee paralysis virus (ABPV) |      |      |        |                   | Black queen cell virus (BQCV) |      |      |        |                   | Chronic bee paralysis virus (CBPV) |      |      |        |                   | Deformed wing virus (DWW) |      |      |        |                   | Israeli acute paralysis virus (IAPV) |      |      |        |                   | Kashmir bee virus (KBV) |      |      |        |                   | Sac brood virus (SBV) |      |      |        |                   |   |   |      |   |                   |
|----------|----------------------------|----------------------------------|------|------|--------|-------------------|-------------------------------|------|------|--------|-------------------|------------------------------------|------|------|--------|-------------------|---------------------------|------|------|--------|-------------------|--------------------------------------|------|------|--------|-------------------|-------------------------|------|------|--------|-------------------|-----------------------|------|------|--------|-------------------|---|---|------|---|-------------------|
|          |                            | May 2016                         | June | July | August | May 2017          | May 2016                      | June | July | August | May 2017          | May 2016                           | June | July | August | May 2017          | May 2016                  | June | July | August | May 2017          | May 2016                             | June | July | August | May 2017          | May 2016                | June | July | August | May 2017          | May 2016              | June | July | August | May 2017          |   |   |      |   |                   |
| 206      | Control MS                 | -                                | -    | N/A* | -      | -                 | +                             | +    | N/A* | -      | +                 | -                                  | -    | N/A* | -      | -                 | -                         | -    | N/A* | -      | -                 | -                                    | -    | N/A* | -      | -                 | -                       | -    | N/A* | -      | -                 | -                     | -    | N/A* | -      | -                 | + | + | N/A* | - | +                 |
| 221      |                            | -                                | -    | -    | -      | -                 | +                             | +    | +    | -      | +                 | -                                  | -    | -    | N/A*   | -                 | -                         | -    | -    | N/A*   | -                 | -                                    | -    | -    | N/A*   | -                 | -                       | -    | -    | N/A*   | -                 | +                     | +    | -    | N/A*   | -                 |   |   |      |   |                   |
| 378      |                            | -                                | -    | -    | N/A*   | -                 | +                             | +    | +    | +      | +                 | -                                  | -    | -    | N/A*   | -                 | -                         | -    | -    | N/A*   | -                 | -                                    | +    | +    | -      | Dead <sup>1</sup> | -                       | +    | -    | -      | -                 | +                     | +    | -    | N/A*   | -                 |   |   |      |   |                   |
| 500      |                            | -                                | -    | -    | -      | Dead <sup>1</sup> | +                             | +    | +    | +      | +                 | -                                  | -    | -    | -      | Dead <sup>1</sup> | -                         | -    | -    | -      | -                 | -                                    | -    | +    | -      | -                 | -                       | +    | +    | -      | Dead <sup>1</sup> | -                     | -    | -    | -      | -                 | + | + | -    | + | Dead <sup>1</sup> |
| 574      |                            | -                                | -    | N/A* | -      | -                 | +                             | +    | N/A* | +      | +                 | -                                  | -    | N/A* | -      | -                 | -                         | -    | N/A* | -      | -                 | -                                    | -    | N/A* | -      | -                 | -                       | -    | N/A* | -      | -                 | -                     | -    | N/A* | -      | -                 | + | + | +    | + | +                 |
| 316      | Blueberry MS               | -                                | -    | -    | -      | -                 | +                             | +    | +    | +      | +                 | -                                  | -    | -    | -      | -                 | -                         | -    | -    | -      | -                 | +                                    | +    | +    | -      | -                 | +                       | -    | -    | -      | -                 | +                     | +    | +    | +      | -                 |   |   |      |   |                   |
| 361      |                            | -                                | -    | -    | -      | -                 | +                             | +    | +    | +      | +                 | -                                  | -    | -    | -      | -                 | -                         | -    | -    | -      | -                 | +                                    | +    | +    | -      | -                 | +                       | -    | -    | -      | -                 | +                     | +    | +    | +      | -                 |   |   |      |   |                   |
| 469      |                            | -                                | -    | -    | -      | -                 | +                             | +    | +    | +      | +                 | -                                  | -    | -    | -      | -                 | -                         | -    | -    | -      | -                 | +                                    | +    | +    | -      | -                 | +                       | -    | -    | -      | -                 | +                     | +    | +    | +      | -                 |   |   |      |   |                   |
| 582      |                            | -                                | -    | -    | -      | -                 | +                             | +    | +    | +      | +                 | -                                  | -    | -    | -      | -                 | -                         | -    | -    | -      | -                 | +                                    | +    | +    | -      | -                 | +                       | -    | -    | -      | -                 | +                     | +    | +    | +      | -                 |   |   |      |   |                   |
| 596      |                            | -                                | -    | -    | -      | -                 | +                             | +    | +    | +      | +                 | -                                  | -    | -    | -      | -                 | -                         | -    | -    | -      | -                 | +                                    | +    | +    | -      | -                 | +                       | -    | -    | -      | -                 | +                     | +    | +    | +      | -                 |   |   |      |   |                   |
| 485      | Cranberry MS               | -                                | -    | -    | -      | Dead <sup>1</sup> | +                             | +    | +    | +      | Dead <sup>1</sup> | -                                  | -    | -    | -      | Dead <sup>1</sup> | -                         | -    | +    | +      | Dead <sup>1</sup> | +                                    | -    | -    | -      | Dead <sup>1</sup> | +                       | -    | -    | -      | Dead <sup>1</sup> | +                     | +    | +    | +      | Dead <sup>1</sup> |   |   |      |   |                   |
| 492      |                            | -                                | -    | -    | N/A*   | -                 | +                             | +    | +    | N/A*   | -                 | -                                  | -    | -    | N/A*   | -                 | -                         | -    | -    | N/A*   | -                 | +                                    | -    | -    | N/A*   | Dead <sup>1</sup> | +                       | -    | -    | N/A*   | Dead <sup>1</sup> | +                     | +    | +    | N/A*   | -                 |   |   |      |   |                   |
| 573      |                            | -                                | -    | N/A* | -      | -                 | +                             | +    | N/A* | +      | +                 | -                                  | -    | N/A* | -      | -                 | -                         | -    | N/A* | +      | -                 | -                                    | -    | N/A* | +      | -                 | +                       | -    | N/A* | -      | -                 | +                     | +    | N/A* | +      | -                 |   |   |      |   |                   |
| 578      |                            | -                                | -    | -    | -      | -                 | +                             | +    | +    | +      | +                 | -                                  | -    | -    | -      | -                 | -                         | -    | +    | -      | -                 | -                                    | -    | +    | -      | -                 | -                       | -    | +    | -      | -                 | +                     | +    | +    | +      | -                 |   |   |      |   |                   |
| 587      |                            | -                                | -    | -    | -      | Dead <sup>1</sup> | +                             | +    | +    | +      | Dead <sup>1</sup> | -                                  | -    | -    | -      | Dead <sup>1</sup> | -                         | -    | +    | +      | Dead <sup>1</sup> | -                                    | -    | +    | -      | Dead <sup>1</sup> | -                       | -    | +    | -      | Dead <sup>1</sup> | +                     | +    | +    | +      | Dead <sup>1</sup> |   |   |      |   |                   |
| 200      | Double MS                  | -                                | -    | N/A* | -      | Dead <sup>1</sup> | +                             | +    | N/A* | +      | Dead <sup>1</sup> | -                                  | -    | N/A* | -      | Dead <sup>1</sup> | -                         | +    | N/A* | -      | Dead <sup>1</sup> | -                                    | +    | N/A* | -      | Dead <sup>1</sup> | -                       | -    | N/A* | -      | Dead <sup>1</sup> | +                     | +    | N/A* | +      | Dead <sup>1</sup> |   |   |      |   |                   |
| 488      |                            | -                                | -    | -    | -      | -                 | +                             | +    | +    | +      | +                 | -                                  | -    | -    | -      | -                 | -                         | -    | +    | -      | -                 | -                                    | -    | +    | -      | -                 | -                       | -    | +    | -      | -                 | +                     | +    | +    | +      | -                 |   |   |      |   |                   |
| 516      |                            | -                                | -    | -    | -      | -                 | +                             | +    | +    | +      | +                 | -                                  | -    | -    | -      | -                 | -                         | -    | +    | -      | -                 | -                                    | -    | +    | -      | -                 | -                       | -    | +    | -      | -                 | +                     | +    | +    | +      | -                 |   |   |      |   |                   |
| 546      |                            | -                                | -    | -    | -      | -                 | +                             | +    | +    | +      | +                 | -                                  | -    | -    | -      | -                 | -                         | -    | +    | -      | -                 | -                                    | -    | +    | -      | -                 | -                       | -    | +    | -      | -                 | +                     | +    | +    | +      | -                 |   |   |      |   |                   |
| 598      |                            | -                                | -    | -    | -      | -                 | +                             | +    | +    | +      | +                 | -                                  | -    | -    | -      | -                 | -                         | -    | +    | -      | -                 | -                                    | -    | +    | -      | -                 | -                       | -    | +    | -      | -                 | +                     | +    | +    | +      | -                 |   |   |      |   |                   |

| Colony # | Management Strategies (MS) | Acute bee paralysis virus (ABPV) |      |      |        |                   | Black queen cell virus (BQCV) |      |      |        |                   | Chronic bee paralysis virus (CBPV) |      |      |        |                   | Deformed wing virus (DWW) |      |      |        |                   | Israeli acute paralysis virus (IAPV) |      |      |        |                   | Kashmir bee virus (KBV) |      |      |        |                   | Sac brood virus (SBV) |      |      |        |                   |
|----------|----------------------------|----------------------------------|------|------|--------|-------------------|-------------------------------|------|------|--------|-------------------|------------------------------------|------|------|--------|-------------------|---------------------------|------|------|--------|-------------------|--------------------------------------|------|------|--------|-------------------|-------------------------|------|------|--------|-------------------|-----------------------|------|------|--------|-------------------|
|          |                            | May 2016                         | June | July | August | May 2017          | May 2016                      | June | July | August | May 2017          | May 2016                           | June | July | August | May 2017          | May 2016                  | June | July | August | May 2017          | May 2016                             | June | July | August | May 2017          | May 2016                | June | July | August | May 2017          | May 2016              | June | July | August | May 2017          |
| 206      | Control MS                 | -                                | -    | -    | -      | -                 | +                             | +    | +    | +      | +                 | -                                  | -    | +    | +      | +                 | -                         | +    | +    | +      | +                 | +                                    | +    | +    | +      | +                 | +                       | +    | +    | +      | +                 | +                     | +    | +    | +      | +                 |
| 221      |                            | -                                | -    | -    | -      | -                 | +                             | +    | +    | +      | +                 | -                                  | -    | +    | +      | +                 | +                         | +    | +    | +      | +                 | +                                    | +    | +    | +      | +                 | +                       | +    | +    | +      | +                 | +                     | +    | +    | +      | +                 |
| 378      |                            | -                                | -    | -    | -      | Dead <sup>1</sup> | +                             | +    | +    | +      | Dead <sup>1</sup> | +                                  | +    | +    | +      | Dead <sup>1</sup> | +                         | +    | +    | +      | Dead <sup>1</sup> | +                                    | +    | +    | +      | Dead <sup>1</sup> | +                       | +    | +    | +      | Dead <sup>1</sup> | +                     | +    | +    | +      | Dead <sup>1</sup> |
| 500      |                            | -                                | -    | -    | +      | -                 | +                             | +    | +    | +      | +                 | -                                  | -    | +    | +      | +                 | -                         | -    | +    | +      | +                 | -                                    | -    | +    | +      | +                 | -                       | -    | +    | +      | +                 | +                     | +    | +    | +      | +                 |
| 574      |                            | -                                | -    | -    | -      | -                 | +                             | +    | +    | +      | +                 | -                                  | -    | +    | +      | +                 | -                         | -    | +    | +      | +                 | -                                    | -    | +    | +      | +                 | -                       | -    | +    | +      | +                 | +                     | +    | +    | +      | +                 |
| 316      | Blueberry MS               | -                                | -    | -    | -      | -                 | +                             | +    | +    | +      | +                 | -                                  | -    | +    | +      | +                 | -                         | -    | +    | +      | +                 | +                                    | +    | +    | +      | +                 | +                       | +    | +    | +      | +                 | +                     | +    | +    | +      | +                 |
| 361      |                            | -                                | -    | -    | -      | -                 | +                             | +    | +    | +      | +                 | -                                  | -    | +    | +      | +                 | -                         | -    | +    | +      | +                 | +                                    | +    | +    | +      | +                 | +                       | +    | +    | +      | +                 | +                     | +    | +    | +      | +                 |
| 469      |                            | -                                | -    | -    | -      | -                 | +                             | +    | +    | +      | +                 | -                                  | -    | +    | +      | +                 | -                         | -    | +    | +      | +                 | +                                    | +    | +    | +      | +                 | +                       | +    | +    | +      | +                 | +                     | +    | +    | +      | +                 |
| 582      |                            | -                                | -    | -    | -      | -                 | +                             | +    | +    | +      | +                 | -                                  | -    | +    | +      | +                 | -                         | -    | +    | +      | +                 | +                                    | +    | +    | +      | +                 | +                       | +    | +    | +      | +                 | +                     | +    | +    | +      | +                 |
| 596      |                            | -                                | -    | -    | -      | -                 | +                             | +    | +    | +      | +                 | -                                  | -    | +    | +      | +                 | -                         | -    | +    | +      | +                 | +                                    | +    | +    | +      | +                 | +                       | +    | +    | +      | +                 | +                     | +    | +    | +      | +                 |
| 485      | Cranberry MS               | -                                | -    | -    | -      | Dead <sup>1</sup> | +                             | +    | +    | +      | Dead <sup>1</sup> | -                                  | +    | -    | -      | Dead <sup>1</sup> | -                         | -    | +    | +      | Dead <sup>1</sup> | +                                    | +    | +    | +      | Dead <sup>1</sup> | +                       | +    | +    | +      | Dead <sup>1</sup> | +                     | +    | +    | +      | Dead <sup>1</sup> |
| 492      |                            | -                                | -    | -    | -      | Dead <sup>1</sup> | +                             | +    | +    | +      | Dead <sup>1</sup> | -                                  | -    | -    | -      | Dead <sup>1</sup> | -                         | -    | -    | -      | Dead <sup>1</sup> | +                                    | +    | +    | +      | Dead <sup>1</sup> | +                       | +    | +    | +      | Dead <sup>1</sup> | +                     | +    | +    | +      | Dead <sup>1</sup> |
| 573      |                            | -                                | -    | -    | -      | +                 | +                             | +    | +    | +      | +                 | -                                  | -    | -    | -      | -                 | -                         | -    | +    | +      | +                 | -                                    | -    | +    | +      | +                 | +                       | +    | +    | +      | +                 | +                     | +    | +    | +      | +                 |
| 578      |                            | -                                | -    | -    | -      | -                 | +                             | +    | +    | +      | +                 | -                                  | -    | -    | -      | -                 | -                         | -    | +    | +      | +                 | -                                    | -    | +    | +      | +                 | +                       | +    | +    | +      | +                 | +                     | +    | +    | +      | +                 |
| 587      |                            | -                                | -    | -    | -      | Dead <sup>1</sup> | +                             | +    | +    | +      | Dead <sup>1</sup> | -                                  | -    | -    | -      | Dead <sup>1</sup> | -                         | -    | -    | -      | Dead <sup>1</sup> | -                                    | -    | +    | +      | Dead <sup>1</sup> | -                       | -    | +    | +      | Dead <sup>1</sup> | +                     | +    | +    | +      | Dead <sup>1</sup> |
| 200      | Double MS                  | -                                | -    | -    | -      | Dead <sup>1</sup> | +                             | +    | +    | +      | Dead <sup>1</sup> | -                                  | -    | -    | +      | Dead <sup>1</sup> | -                         | -    | +    | -      | Dead <sup>1</sup> | +                                    | +    | +    | +      | Dead <sup>1</sup> | +                       | +    | +    | +      | Dead <sup>1</sup> | +                     | +    | +    | +      | Dead <sup>1</sup> |
| 488      |                            | -                                | -    | -    | -      | -                 | +                             | +    | +    | +      | +                 | -                                  | -    | -    | -      | -                 | -                         | -    | +    | +      | +                 | +                                    | +    | +    | +      | +                 | +                       | +    | +    | +      | +                 | +                     | +    | +    | +      | +                 |
| 516      |                            | -                                | -    | -    | -      | -                 | +                             | +    | +    | +      | +                 | -                                  | -    | -    | -      | -                 | -                         | -    | +    | +      | +                 | +                                    | +    | +    | +      | +                 | +                       | +    | +    | +      | +                 | +                     | +    | +    | +      | +                 |
| 546      |                            | -                                | -    | -    | -      | -                 | +                             | +    | +    | +      | +                 | -                                  | -    | -    | -      | -                 | -                         | -    | +    | +      | +                 | +                                    | +    | +    | +      | +                 | +                       | +    | +    | +      | +                 | +                     | +    | +    | +      | +                 |
| 598      |                            | -                                | -    | -    | -      | -                 | +                             | +    | +    | +      | +                 | -                                  | -    | -    | -      | -                 | -                         | -    | +    | +      | +                 | +                                    | +    | +    | +      | +                 | +                       | +    | +    | +      | +                 | +                     | +    | +    | +      | +                 |

"+" indicates the virus was detected and "-" indicates the virus was not present  
 \* N/A indicates there was no larvae in the colony at the moment of the sampling  
<sup>1</sup> "Dead" indicates the colony has died over the winter 2016-2017
