# Supplementary material for: The impact of lowbush blueberry (Vaccinium angustifolium Ait.) and cranberry (Vaccinium macrocarpon Ait.) pollination on honey bee (Apis mellifera L.) colony health status
Source: PubMed Central journal article supplement (PMC6980599; doi:10.1371/journal.pone.0227970), 2020-01-24
Supplement: pone.0227970.s003.pdf [file pone.0227970.s003.pdf]

| BEEHIVE# | MANAGEMENT STRATEGIES | TIME        | APIARY    | VIRUSES IN LARVAE |                   |                  |                   |                   |                   |                  |
|----------|-----------------------|-------------|-----------|-------------------|-------------------|------------------|-------------------|-------------------|-------------------|------------------|
|          |                       |             |           | ABPV              | BQCV              | CBPV             | DWV               | IAPV              | KBV               | SBV              |
| 206      | CONTROL MS            | MAY 2016    | FARMLAND  | 0                 | 218867            | 0                | 0                 | 0                 | 0                 | 361              |
| 221      | CONTROL MS            | MAY 2016    | FARMLAND  | 0                 | 761066            | 0                | 0                 | 0                 | 0                 | 1524             |
| 378      | CONTROL MS            | MAY 2016    | FARMLAND  | 0                 | 716367            | 0                | 0                 | 0                 | 0                 | 0                |
| 500      | CONTROL MS            | MAY 2016    | FARMLAND  | 0                 | 917468            | 0                | 0                 | 0                 | 0                 | 2830             |
| 574      | CONTROL MS            | MAY 2016    | FARMLAND  | 0                 | 104111            | 0                | 0                 | 0                 | 0                 | 0                |
| 316      | BLUEBERRY MS          | MAY 2016    | FARMLAND  | 0                 | 4038665           | 0                | 0                 | 0                 | 0                 | 1865             |
| 361      | BLUEBERRY MS          | MAY 2016    | FARMLAND  | 0                 | 22740457          | 0                | 0                 | 36223             | 23409             | 0                |
| 469      | BLUEBERRY MS          | MAY 2016    | FARMLAND  | 0                 | 9658928           | 0                | 0                 | 2600              | 0                 | 949              |
| 582      | BLUEBERRY MS          | MAY 2016    | FARMLAND  | 0                 | 447917            | 0                | 0                 | 0                 | 0                 | 381              |
| 596      | BLUEBERRY MS          | MAY 2016    | FARMLAND  | 0                 | 2268965           | 0                | 0                 | 0                 | 0                 | 0                |
| 485      | CRANBERRY MS          | MAY 2016    | FARMLAND  | 0                 | 6605655           | 0                | 0                 | 0                 | 0                 | 207              |
| 492      | CRANBERRY MS          | MAY 2016    | FARMLAND  | 0                 | 33564073          | 0                | 0                 | <MDL <sup>2</sup> | <MDL <sup>2</sup> | 375              |
| 573      | CRANBERRY MS          | MAY 2016    | FARMLAND  | 0                 | 1570629           | 0                | 0                 | 0                 | 0                 | 263              |
| 578      | CRANBERRY MS          | MAY 2016    | FARMLAND  | 0                 | 2142342           | 0                | 0                 | 0                 | 0                 | 3204             |
| 587      | CRANBERRY MS          | MAY 2016    | FARMLAND  | 0                 | 1732777           | 0                | 0                 | 0                 | 0                 | 3196             |
| 200      | DOUBLE MS             | MAY 2016    | FARMLAND  | 0                 | 379520            | 0                | 0                 | 0                 | 0                 | 230              |
| 488      | DOUBLE MS             | MAY 2016    | FARMLAND  | 0                 | 8761661           | 0                | 0                 | 0                 | 0                 | 0                |
| 516      | DOUBLE MS             | MAY 2016    | FARMLAND  | 0                 | 3574647           | 0                | 0                 | 0                 | 0                 | 5364             |
| 546      | DOUBLE MS             | MAY 2016    | FARMLAND  | 0                 | 3869747           | 0                | 0                 | 4876              | 0                 | 134              |
| 598      | DOUBLE MS             | MAY 2016    | FARMLAND  | 0                 | 76246850          | 0                | 0                 | 0                 | 0                 | 5515             |
| 206      | CONTROL MS            | JUNE 2016   | FARMLAND  | 0                 | 326789            | 0                | 0                 | 0                 | 0                 | 13325            |
| 221      | CONTROL MS            | JUNE 2016   | FARMLAND  | 0                 | 167318            | 0                | 0                 | 0                 | 0                 | 58318            |
| 378      | CONTROL MS            | JUNE 2016   | FARMLAND  | 0                 | 124129            | 0                | 0                 | 150513            | 2127              | 0                |
| 500      | CONTROL MS            | JUNE 2016   | FARMLAND  | 0                 | 441203            | 0                | 0                 | 0                 | 0                 | 893              |
| 574      | CONTROL MS            | JUNE 2016   | FARMLAND  | 0                 | 808149            | 0                | 0                 | 0                 | 0                 | 1448             |
| 316      | BLUEBERRY MS          | JUNE 2016   | BLUEBERRY | 0                 | 4879451           | 0                | 0                 | 0                 | 0                 | 53221            |
| 361      | BLUEBERRY MS          | JUNE 2016   | BLUEBERRY | 0                 | 4367077           | 0                | 0                 | 0                 | 0                 | 1558302          |
| 469      | BLUEBERRY MS          | JUNE 2016   | BLUEBERRY | 0                 | 5255496           | 0                | 0                 | 4373              | 0                 | 82519            |
| 582      | BLUEBERRY MS          | JUNE 2016   | BLUEBERRY | 0                 | 1951088           | 0                | 0                 | 0                 | 0                 | 5521             |
| 596      | BLUEBERRY MS          | JUNE 2016   | BLUEBERRY | 0                 | 506147            | 0                | 0                 | 4579              | 0                 | 1074             |
| 485      | CRANBERRY MS          | JUNE 2016   | FARMLAND  | 0                 | 3278469           | 0                | 0                 | 0                 | 0                 | 23317            |
| 492      | CRANBERRY MS          | JUNE 2016   | FARMLAND  | 0                 | 28433530          | 0                | 0                 | 0                 | 0                 | 7390             |
| 573      | CRANBERRY MS          | JUNE 2016   | FARMLAND  | 0                 | 1788415           | 0                | 0                 | 0                 | 0                 | 6627             |
| 578      | CRANBERRY MS          | JUNE 2016   | FARMLAND  | 0                 | 1062109           | 0                | 0                 | 0                 | 0                 | 456              |
| 587      | CRANBERRY MS          | JUNE 2016   | FARMLAND  | 0                 | 1025490           | 0                | 0                 | 0                 | 0                 | 2266             |
| 200      | DOUBLE MS             | JUNE 2016   | BLUEBERRY | 0                 | 8415389           | 0                | 0                 | 400191            | 0                 | 190228733        |
| 488      | DOUBLE MS             | JUNE 2016   | BLUEBERRY | 0                 | 2841796           | 0                | 0                 | 0                 | 0                 | 62799            |
| 516      | DOUBLE MS             | JUNE 2016   | BLUEBERRY | 0                 | 3934868           | 0                | 0                 | 20950             | 0                 | 21260            |
| 546      | DOUBLE MS             | JUNE 2016   | BLUEBERRY | 0                 | 4432069           | 0                | 0                 | 0                 | 0                 | 16580            |
| 598      | DOUBLE MS             | JUNE 2016   | BLUEBERRY | 0                 | 48822729          | 0                | 0                 | 0                 | 0                 | 6186383          |
| 206      | CONTROL MS            | JULY 2016   | FARMLAND  | N/A <sup>1</sup>  | N/A <sup>1</sup>  | N/A <sup>1</sup> | N/A <sup>1</sup>  | N/A <sup>1</sup>  | N/A <sup>1</sup>  | N/A <sup>1</sup> |
| 221      | CONTROL MS            | JULY 2016   | FARMLAND  | 0                 | 725668            | 0                | 0                 | 0                 | 0                 | 8573             |
| 378      | CONTROL MS            | JULY 2016   | FARMLAND  | 0                 | 79847             | 0                | 0                 | 4161983           | 0                 | 0                |
| 500      | CONTROL MS            | JULY 2016   | FARMLAND  | 0                 | 432541            | 0                | 0                 | 0                 | 0                 | 1507             |
| 574      | CONTROL MS            | JULY 2016   | FARMLAND  | N/A <sup>1</sup>  | N/A <sup>1</sup>  | N/A <sup>1</sup> | N/A <sup>1</sup>  | N/A <sup>1</sup>  | N/A <sup>1</sup>  | N/A <sup>1</sup> |
| 316      | BLUEBERRY MS          | JULY 2016   | FARMLAND  | 0                 | 5206194           | 0                | <MDL <sup>2</sup> | 0                 | 0                 | 1093             |
| 361      | BLUEBERRY MS          | JULY 2016   | FARMLAND  | 0                 | 1573081           | 0                | 0                 | 0                 | 0                 | 2896             |
| 469      | BLUEBERRY MS          | JULY 2016   | FARMLAND  | 0                 | 2339400           | 0                | 0                 | 5949              | 0                 | 17473            |
| 582      | BLUEBERRY MS          | JULY 2016   | FARMLAND  | 0                 | 805981            | 0                | 0                 | 0                 | 0                 | 195              |
| 596      | BLUEBERRY MS          | JULY 2016   | FARMLAND  | 0                 | 2448360           | 0                | 0                 | 0                 | 0                 | 1972             |
| 485      | CRANBERRY MS          | JULY 2016   | CRANBERRY | 0                 | 8356979           | 0                | <MDL <sup>2</sup> | 0                 | 0                 | 232042           |
| 492      | CRANBERRY MS          | JULY 2016   | CRANBERRY | 0                 | 7422035           | 0                | 0                 | 0                 | 0                 | 87901            |
| 573      | CRANBERRY MS          | JULY 2016   | CRANBERRY | N/A <sup>1</sup>  | N/A <sup>1</sup>  | N/A <sup>1</sup> | N/A <sup>1</sup>  | N/A <sup>1</sup>  | N/A <sup>1</sup>  | N/A <sup>1</sup> |
| 578      | CRANBERRY MS          | JULY 2016   | CRANBERRY | 0                 | 5896345           | 0                | <MDL <sup>2</sup> | 0                 | 0                 | 216004           |
| 587      | CRANBERRY MS          | JULY 2016   | CRANBERRY | 0                 | 118367260         | 0                | <MDL <sup>2</sup> | 0                 | 0                 | 4186770          |
| 200      | DOUBLE MS             | JULY 2016   | CRANBERRY | N/A <sup>1</sup>  | N/A <sup>1</sup>  | N/A <sup>1</sup> | N/A <sup>1</sup>  | N/A <sup>1</sup>  | N/A <sup>1</sup>  | N/A <sup>1</sup> |
| 488      | DOUBLE MS             | JULY 2016   | CRANBERRY | 0                 | 3811996           | 0                | 0                 | 0                 | 0                 | 281093           |
| 516      | DOUBLE MS             | JULY 2016   | CRANBERRY | 0                 | 4410712           | 0                | <MDL <sup>2</sup> | 0                 | 0                 | 36916            |
| 546      | DOUBLE MS             | JULY 2016   | CRANBERRY | 0                 | 4267112           | 0                | 0                 | 0                 | 0                 | 157071           |
| 598      | DOUBLE MS             | JULY 2016   | CRANBERRY | 0                 | 1035838823        | 0                | 0                 | 0                 | 0                 | 1858899          |
| 206      | CONTROL MS            | AUGUST 2016 | FARMLAND  | 0                 | 237947            | 0                | 0                 | 0                 | 0                 | 174              |
| 221      | CONTROL MS            | AUGUST 2016 | FARMLAND  | N/A <sup>1</sup>  | N/A <sup>1</sup>  | N/A <sup>1</sup> | N/A <sup>1</sup>  | N/A <sup>1</sup>  | N/A <sup>1</sup>  | N/A <sup>1</sup> |
| 378      | CONTROL MS            | AUGUST 2016 | FARMLAND  | 0                 | 1012487           | 0                | 0                 | 0                 | 0                 | 13651            |
| 500      | CONTROL MS            | AUGUST 2016 | FARMLAND  | 0                 | <MDL <sup>2</sup> | 0                | 0                 | 0                 | 0                 | 0                |
| 574      | CONTROL MS            | AUGUST 2016 | FARMLAND  | 0                 | 769970            | 0                | 0                 | 0                 | 0                 | 4230             |
| 316      | BLUEBERRY MS          | AUGUST 2016 | FARMLAND  | 0                 | 2465875           | 0                | 0                 | 0                 | 0                 | 9534             |
| 361      | BLUEBERRY MS          | AUGUST 2016 | FARMLAND  | 0                 | 12352314          | 0                | 0                 | 0                 | 0                 | 71950            |
| 469      | BLUEBERRY MS          | AUGUST 2016 | FARMLAND  | 0                 | 861945            | 0                | 0                 | 0                 | 0                 | 0                |
| 582      | BLUEBERRY MS          | AUGUST 2016 | FARMLAND  | 0                 | 13768075          | 0                | 0                 | 0                 | 0                 | 23459            |
| 596      | BLUEBERRY MS          | AUGUST 2016 | FARMLAND  | 0                 | 2138599           | 0                | 0                 | 0                 | 0                 | 27379            |
| 485      | CRANBERRY MS          | AUGUST 2016 | FARMLAND  | 0                 | 2463063           | 0                | 0                 | 0                 | 0                 | 31114            |
| 492      | CRANBERRY MS          | AUGUST 2016 | FARMLAND  | N/A <sup>1</sup>  | N/A <sup>1</sup>  | N/A <sup>1</sup> | N/A <sup>1</sup>  | N/A <sup>1</sup>  | N/A <sup>1</sup>  | N/A <sup>1</sup> |
| 573      | CRANBERRY MS          | AUGUST 2016 | FARMLAND  | 0                 | 21875315          | 0                | 0                 | <MDL <sup>2</sup> | 0                 | 50602            |
| 578      | CRANBERRY MS          | AUGUST 2016 | FARMLAND  | 0                 | 1865922           | 0                | 0                 | 0                 | 0                 | 11238            |
| 587      | CRANBERRY MS          | AUGUST 2016 | FARMLAND  | 0                 | 936344846         | 0                | 0                 | 0                 | 0                 | 96001            |
| 200      | DOUBLE MS             | AUGUST 2016 | FARMLAND  | 0                 | 1826084           | 0                | 0                 | 0                 | 0                 | 23454            |
| 488      | DOUBLE MS             | AUGUST 2016 | FARMLAND  | 0                 | 140734            | 0                | 0                 | 8823              | 0                 | 196              |
| 516      | DOUBLE MS             | AUGUST 2016 | FARMLAND  | 0                 | 1024117           | 0                | 0                 | 6169              | 0                 | 71402            |
| 546      | DOUBLE MS             | AUGUST 2016 | FARMLAND  | 0                 | 375814            | 0                | 0                 | 0                 | 0                 | 185              |
| 598      | DOUBLE MS             | AUGUST 2016 | FARMLAND  | 0                 | 217684760         | 0                | 0                 | 0                 | 0                 | 12995651         |
| 206      | CONTROL MS            | MAY 2017    | FARMLAND  | 0                 | 1175000000        | 0                | 0                 | 0                 | 0                 | 5363             |
| 221      | CONTROL MS            | MAY 2017    | FARMLAND  | 0                 | 1240000000        | 0                | 0                 | 0                 | 0                 | 0                |
| 378      | CONTROL MS            | MAY 2017    | FARMLAND  | Dead colony       |                   |                  |                   |                   |                   |                  |
| 500      | CONTROL MS            | MAY 2017    | FARMLAND  | 0                 | 62000000          | 0                | 0                 | 0                 | 0                 | 0                |
| 574      | CONTROL MS            | MAY 2017    | FARMLAND  | 0                 | 10000000          | 0                | 0                 | 0                 | 0                 | 2583             |
| 316      | BLUEBERRY MS          | MAY 2017    | FARMLAND  | 0                 | 840000            | 0                | 0                 | 0                 | 0                 | 0                |
| 361      | BLUEBERRY MS          | MAY 2017    | FARMLAND  | 0                 | 26650000          | 0                | 0                 | 0                 | 0                 | 0                |
| 469      | BLUEBERRY MS          | MAY 2017    | FARMLAND  | 0                 | 1675000           | 0                | 0                 | 0                 | 0                 | 0                |
| 582      | BLUEBERRY MS          | MAY 2017    | FARMLAND  | 0                 | 5150000           | 0                | 0                 | 0                 | 0                 | 0                |
| 596      | BLUEBERRY MS          | MAY 2017    | FARMLAND  | 0                 | 6900000           | 0                | 0                 | 0                 | 0                 | 0                |
| 485      | CRANBERRY MS          | MAY 2017    | FARMLAND  | Dead colony       |                   |                  |                   |                   |                   |                  |
| 492      | CRANBERRY MS          | MAY 2017    | FARMLAND  | Dead colony       |                   |                  |                   |                   |                   |                  |
| 573      | CRANBERRY MS          | MAY 2017    | FARMLAND  | 0                 | 1785000           | 0                | 0                 | 0                 | 0                 | 0                |
| 578      | CRANBERRY MS          | MAY 2017    | FARMLAND  | 0                 | 75500             | 0                | 0                 | 0                 | 0                 | 0                |
| 587      | CRANBERRY MS          | MAY 2017    | FARMLAND  | Dead colony       |                   |                  |                   |                   |                   |                  |
| 200      | DOUBLE MS             | MAY 2017    | FARMLAND  | Dead colony       |                   |                  |                   |                   |                   |                  |
| 488      | DOUBLE MS             | MAY 2017    | FARMLAND  | 0                 | 417000            | 0                | 0                 | 0                 | 0                 | 0                |
| 516      | DOUBLE MS             | MAY 2017    | FARMLAND  | 0                 | 945000            | 0                | 0                 | 0                 | 0                 | 0                |
| 546      | DOUBLE MS             | MAY 2017    | FARMLAND  | 0                 | 1110000           | 0                | 0                 | 0                 | 0                 | 0                |
| 598      | DOUBLE MS             | MAY 2017    | FARMLAND  | 0                 | 500000            | 0                | 0                 | 0                 | 0                 | 1162             |

<sup>1</sup>“N/A” indicates larvae were not available in a given colony at the sampling time

<sup>2</sup><“MDL” indicates the number of virus copies was below the minimum detection limit but was positive
