# Supplementary material for: The impact of lowbush blueberry (Vaccinium angustifolium Ait.) and cranberry (Vaccinium macrocarpon Ait.) pollination on honey bee (Apis mellifera L.) colony health status
Source: PubMed Central journal article supplement (PMC6980599; doi:10.1371/journal.pone.0227970), 2020-01-24
Supplement: pone.0227970.s004.pdf [file pone.0227970.s004.pdf]

| BEEHIVE#                                                                                                       | MANAGEMENT STRATEGIES | TIME        | APIARY    | VIRUSES IN NURSE BEES |              |                   |                   |                   |                   |                   |
|----------------------------------------------------------------------------------------------------------------|-----------------------|-------------|-----------|-----------------------|--------------|-------------------|-------------------|-------------------|-------------------|-------------------|
|                                                                                                                |                       |             |           | ABPV                  | BQCV         | CBPV              | DWV               | IAPV              | KBV               | SBV               |
| 206                                                                                                            | CONTROL MS            | MAY 2016    | FARMLAND  | 0                     | 887222126    | 0                 | 0                 | 2680              | 11293             | 172950            |
| 221                                                                                                            | CONTROL MS            | MAY 2016    | FARMLAND  | 0                     | 45274237870  | <MDL <sup>1</sup> | <MDL <sup>1</sup> | 0                 | 33682             | 118443853100      |
| 378                                                                                                            | CONTROL MS            | MAY 2016    | FARMLAND  | 0                     | 222904710    | 0                 | 0                 | 1130000           | 1102706           | 55263             |
| 500                                                                                                            | CONTROL MS            | MAY 2016    | FARMLAND  | 0                     | 218706721    | 0                 | 0                 | 0                 | 0                 | 89121             |
| 574                                                                                                            | CONTROL MS            | MAY 2016    | FARMLAND  | 0                     | 75159554     | 0                 | 0                 | 0                 | 0                 | 1229              |
| 316                                                                                                            | BLUEBERRY MS          | MAY 2016    | FARMLAND  | 0                     | 533919462    | 0                 | 0                 | 2480000           | 191619            | 24093601          |
| 361                                                                                                            | BLUEBERRY MS          | MAY 2016    | FARMLAND  | 0                     | 366664372    | 0                 | 0                 | 45300             | 7280              | 507899729000      |
| 469                                                                                                            | BLUEBERRY MS          | MAY 2016    | FARMLAND  | 0                     | 477106712    | 0                 | 0                 | 393000000         | 439102            | 53008             |
| 582                                                                                                            | BLUEBERRY MS          | MAY 2016    | FARMLAND  | 0                     | 124295866    | 0                 | 0                 | 87500             | <MDL <sup>1</sup> | 378594            |
| 596                                                                                                            | BLUEBERRY MS          | MAY 2016    | FARMLAND  | 0                     | 168347381    | 0                 | 0                 | 1045000           | 8512              | 10635             |
| 485                                                                                                            | CRANBERRY MS          | MAY 2016    | FARMLAND  | 0                     | 599269083    | 0                 | 0                 | 0                 | 0                 | 3825              |
| 492                                                                                                            | CRANBERRY MS          | MAY 2016    | FARMLAND  | 0                     | 12237867615  | 0                 | 0                 | <MDL <sup>1</sup> | 0                 | 21439             |
| 573                                                                                                            | CRANBERRY MS          | MAY 2016    | FARMLAND  | 0                     | 51729492     | 0                 | 0                 | 0                 | <MDL <sup>1</sup> | 25536             |
| 578                                                                                                            | CRANBERRY MS          | MAY 2016    | FARMLAND  | 0                     | 36525741     | 0                 | 0                 | 0                 | 0                 | 1228              |
| 587                                                                                                            | CRANBERRY MS          | MAY 2016    | FARMLAND  | 0                     | 359943006    | 0                 | 0                 | 0                 | 0                 | 8444              |
| 200                                                                                                            | DOUBLE MS             | MAY 2016    | FARMLAND  | 0                     | 157087654    | 0                 | 0                 | 0                 | 0                 | 26614             |
| 488                                                                                                            | DOUBLE MS             | MAY 2016    | FARMLAND  | 0                     | 502457937    | 0                 | 0                 | 625000000         | 8809419           | 494679            |
| 516                                                                                                            | DOUBLE MS             | MAY 2016    | FARMLAND  | 0                     | 305148498    | 0                 | 0                 | 7050000           | 153604            | 125038417600      |
| 546                                                                                                            | DOUBLE MS             | MAY 2016    | FARMLAND  | 0                     | 120607137    | 0                 | 0                 | 1015000           | <MDL <sup>1</sup> | <MDL <sup>1</sup> |
| 598                                                                                                            | DOUBLE MS             | MAY 2016    | FARMLAND  | 0                     | 617232264000 | <MDL <sup>1</sup> | 0                 | <MDL <sup>1</sup> | 0                 | 268216            |
| 206                                                                                                            | CONTROL MS            | JUNE 2016   | FARMLAND  | 0                     | 416189549300 | 0                 | <MDL <sup>1</sup> | 265000000         | 59561093          | 135862            |
| 221                                                                                                            | CONTROL MS            | JUNE 2016   | FARMLAND  | 0                     | 385515714    | 76381             | <MDL <sup>1</sup> | 231545878900      | 2324312333        | 1213335           |
| 378                                                                                                            | CONTROL MS            | JUNE 2016   | FARMLAND  | 0                     | 169868424    | 0                 | <MDL <sup>1</sup> | 236000000000      | 13858597          | 94455             |
| 500                                                                                                            | CONTROL MS            | JUNE 2016   | FARMLAND  | 0                     | 553762431    | 0                 | 0                 | 125000000         | 82805             | 375302            |
| 574                                                                                                            | CONTROL MS            | JUNE 2016   | FARMLAND  | 0                     | 19013101     | 0                 | 0                 | 491500            | 0                 | 183313            |
| 316                                                                                                            | BLUEBERRY MS          | JUNE 2016   | BLUEBERRY | 0                     | 21100566     | 0                 | 0                 | 3342216           | 0                 | 97479             |
| 361                                                                                                            | BLUEBERRY MS          | JUNE 2016   | BLUEBERRY | 0                     | 83004083     | 0                 | 0                 | 0                 | 0                 | 1034051           |
| 469                                                                                                            | BLUEBERRY MS          | JUNE 2016   | BLUEBERRY | 0                     | 231587132    | 0                 | 0                 | 5572401           | 0                 | 1585049           |
| 582                                                                                                            | BLUEBERRY MS          | JUNE 2016   | BLUEBERRY | 0                     | 498576369    | 0                 | 0                 | 704989            | 18203             | 3758558           |
| 596                                                                                                            | BLUEBERRY MS          | JUNE 2016   | BLUEBERRY | 0                     | 348319571    | 0                 | 0                 | 622455135         | <MDL <sup>1</sup> | 1924274           |
| 485                                                                                                            | CRANBERRY MS          | JUNE 2016   | FARMLAND  | 0                     | 734319279    | 8300              | 0                 | 378500000000      | 3404199378        | 564778            |
| 492                                                                                                            | CRANBERRY MS          | JUNE 2016   | FARMLAND  | 0                     | 116166081    | 0                 | 0                 | 45648189          | 11827884          | 44042             |
| 573                                                                                                            | CRANBERRY MS          | JUNE 2016   | FARMLAND  | 0                     | 512904276    | 0                 | 0                 | 1475000           | <MDL <sup>1</sup> | 504151            |
| 578                                                                                                            | CRANBERRY MS          | JUNE 2016   | FARMLAND  | 0                     | 323476844    | 0                 | 0                 | 67000000          | 22522             | 5173697           |
| 587                                                                                                            | CRANBERRY MS          | JUNE 2016   | FARMLAND  | 0                     | 43751459     | 0                 | 0                 | 0                 | 0                 | 508564            |
| 200                                                                                                            | DOUBLE MS             | JUNE 2016   | BLUEBERRY | 0                     | 1017915931   | 0                 | 0                 | 67000000          | 21607891          | 1720506           |
| 488                                                                                                            | DOUBLE MS             | JUNE 2016   | BLUEBERRY | 0                     | 530583584    | 0                 | 0                 | 4770000000        | 67650             | 1032953           |
| 516                                                                                                            | DOUBLE MS             | JUNE 2016   | BLUEBERRY | 0                     | 177044078    | 0                 | <MDL <sup>1</sup> | 1850000000        | 108170474         | 61043811400       |
| 546                                                                                                            | DOUBLE MS             | JUNE 2016   | BLUEBERRY | 0                     | 1129408967   | 0                 | 0                 | 8550              | 0                 | 1097818           |
| 598                                                                                                            | DOUBLE MS             | JUNE 2016   | BLUEBERRY | 0                     | 1252115045   | 0                 | 0                 | 397500            | 25087             | 83066268200       |
| 206                                                                                                            | CONTROL MS            | JULY 2016   | FARMLAND  | 0                     | 975244670000 | 0                 | 0                 | 12250000          | 2762180           | 349815            |
| 221                                                                                                            | CONTROL MS            | JULY 2016   | FARMLAND  | 0                     | 1369083475   | <MDL <sup>1</sup> | <MDL <sup>1</sup> | 0                 | 0                 | 1716015445        |
| 378                                                                                                            | CONTROL MS            | JULY 2016   | FARMLAND  | 0                     | 158725339    | 0                 | 0                 | 179000000000      | 5500168180        | 562928            |
| 500                                                                                                            | CONTROL MS            | JULY 2016   | FARMLAND  | 0                     | 74308211     | 0                 | 0                 | 0                 | 0                 | 2195615045        |
| 574                                                                                                            | CONTROL MS            | JULY 2016   | FARMLAND  | 0                     | 124650927    | 0                 | <MDL <sup>1</sup> | 6650              | 0                 | 72638             |
| 316                                                                                                            | BLUEBERRY MS          | JULY 2016   | FARMLAND  | 0                     | 171115611    | 0                 | 0                 | 23550             | 0                 | 87440             |
| 361                                                                                                            | BLUEBERRY MS          | JULY 2016   | FARMLAND  | 0                     | 523849688    | 0                 | 0                 | 0                 | 0                 | 276232            |
| 469                                                                                                            | BLUEBERRY MS          | JULY 2016   | FARMLAND  | 0                     | 2001876414   | 0                 | 0                 | 0                 | 0                 | 133188            |
| 582                                                                                                            | BLUEBERRY MS          | JULY 2016   | FARMLAND  | 0                     | 324629576    | 0                 | 0                 | 272000            | 0                 | 59494676750       |
| 596                                                                                                            | BLUEBERRY MS          | JULY 2016   | FARMLAND  | 0                     | 970636196    | 0                 | 0                 | 11750             | 0                 | 14389452610       |
| 485                                                                                                            | CRANBERRY MS          | JULY 2016   | CRANBERRY | 0                     | 261721619    | 0                 | <MDL <sup>1</sup> | 0                 | 0                 | 2553661           |
| 492                                                                                                            | CRANBERRY MS          | JULY 2016   | CRANBERRY | 0                     | 5635451570   | 0                 | 0                 | 168500            | 0                 | 3525284           |
| 573                                                                                                            | CRANBERRY MS          | JULY 2016   | CRANBERRY | 0                     | 117168835    | 0                 | <MDL <sup>1</sup> | 114400            | 0                 | 1785268507        |
| 578                                                                                                            | CRANBERRY MS          | JULY 2016   | CRANBERRY | 0                     | 766316992500 | 0                 | 0                 | 8200              | 0                 | 271082815800      |
| 587                                                                                                            | CRANBERRY MS          | JULY 2016   | CRANBERRY | 0                     | 321208522    | 0                 | 0                 | 25700             | 0                 | 47302007870       |
| 200                                                                                                            | DOUBLE MS             | JULY 2016   | CRANBERRY | 0                     | 24767474105  | 0                 | <MDL <sup>1</sup> | 26050             | 0                 | 17019079320       |
| 488                                                                                                            | DOUBLE MS             | JULY 2016   | CRANBERRY | 0                     | 231643859    | 0                 | <MDL <sup>1</sup> | 1390000000        | 74499877          | 1033515           |
| 516                                                                                                            | DOUBLE MS             | JULY 2016   | CRANBERRY | 0                     | 325989058    | 0                 | <MDL <sup>1</sup> | 3490000           | 18926             | 38929319290       |
| 546                                                                                                            | DOUBLE MS             | JULY 2016   | CRANBERRY | 0                     | 24124774715  | 0                 | 0                 | 172500000000      | 84789             | 1922213           |
| 598                                                                                                            | DOUBLE MS             | JULY 2016   | CRANBERRY | 0                     | 923989769500 | 0                 | 0                 | 61000             | 25054             | 100042486100      |
| 206                                                                                                            | CONTROL MS            | AUGUST 2016 | FARMLAND  | 0                     | 139658597    | <MDL <sup>1</sup> | 0                 | 185500            | 0                 | 204443            |
| 221                                                                                                            | CONTROL MS            | AUGUST 2016 | FARMLAND  | 0                     | 39936634800  | 735               | 0                 | 0                 | 0                 | 53955             |
| 378                                                                                                            | CONTROL MS            | AUGUST 2016 | FARMLAND  | 0                     | 1667364      | 0                 | 0                 | 0                 | 0                 | 1199959           |
| 500                                                                                                            | CONTROL MS            | AUGUST 2016 | FARMLAND  | <MDL <sup>1</sup>     | 147250932    | 23650             | 0                 | 39350             | 0                 | 1167270           |
| 574                                                                                                            | CONTROL MS            | AUGUST 2016 | FARMLAND  | 0                     | 657048941    | 0                 | 0                 | 0                 | 0                 | 92710             |
| 316                                                                                                            | BLUEBERRY MS          | AUGUST 2016 | FARMLAND  | 0                     | 53357211     | 0                 | 0                 | 14150             | 0                 | 65103             |
| 361                                                                                                            | BLUEBERRY MS          | AUGUST 2016 | FARMLAND  | 0                     | 4417696686   | 0                 | <MDL <sup>1</sup> | 0                 | 0                 | 633137            |
| 469                                                                                                            | BLUEBERRY MS          | AUGUST 2016 | FARMLAND  | 0                     | 58716226     | 0                 | 30550             | 0                 | 0                 | 79518             |
| 582                                                                                                            | BLUEBERRY MS          | AUGUST 2016 | FARMLAND  | 0                     | 25247381     | <MDL <sup>1</sup> | 0                 | 0                 | 0                 | 156334            |
| 596                                                                                                            | BLUEBERRY MS          | AUGUST 2016 | FARMLAND  | 0                     | 461409844    | 0                 | 0                 | 57500             | 0                 | 1910914311        |
| 485                                                                                                            | CRANBERRY MS          | AUGUST 2016 | FARMLAND  | 0                     | 244373137    | 0                 | <MDL <sup>1</sup> | <MDL <sup>1</sup> | 0                 | 19211481575       |
| 492                                                                                                            | CRANBERRY MS          | AUGUST 2016 | FARMLAND  | 0                     | 37562747     | 0                 | 0                 | 11300             | <MDL <sup>1</sup> | 3675462           |
| 573                                                                                                            | CRANBERRY MS          | AUGUST 2016 | FARMLAND  | 0                     | 10983669210  | 0                 | 0                 | 935000            | <MDL <sup>1</sup> | 8743734           |
| 578                                                                                                            | CRANBERRY MS          | AUGUST 2016 | FARMLAND  | 0                     | 22725638170  | 0                 | 0                 | 44700000          | 171326            | 4186130610        |
| 587                                                                                                            | CRANBERRY MS          | AUGUST 2016 | FARMLAND  | 0                     | 15039863560  | 0                 | 0                 | 0                 | 0                 | 11079420          |
| 200                                                                                                            | DOUBLE MS             | AUGUST 2016 | FARMLAND  | 0                     | 178199290    | <MDL <sup>1</sup> | 0                 | 0                 | 0                 | 98428612450       |
| 488                                                                                                            | DOUBLE MS             | AUGUST 2016 | FARMLAND  | 0                     | 445469095    | 0                 | 0                 | 126000            | 12482             | 237632            |
| 516                                                                                                            | DOUBLE MS             | AUGUST 2016 | FARMLAND  | 0                     | 201021211    | 0                 | 0                 | 164000000         | 5200938           | 70067844200       |
| 546                                                                                                            | DOUBLE MS             | AUGUST 2016 | FARMLAND  | 0                     | 183811322    | 0                 | 104500            | <MDL <sup>1</sup> | 0                 | 441827            |
| 598                                                                                                            | DOUBLE MS             | AUGUST 2016 | FARMLAND  | 0                     | 220893381    | 0                 | 0                 | 3575              | 0                 | 93170806550       |
| 206                                                                                                            | CONTROL MS            | MAY 2017    | FARMLAND  | 0                     | 427500000    | 1085              | 73000             | 2685              | 0                 | 2130              |
| 221                                                                                                            | CONTROL MS            | MAY 2017    | FARMLAND  | 0                     | 6200000000   | <MDL <sup>1</sup> | <MDL <sup>1</sup> | 0                 | 0                 | 2245              |
| 378                                                                                                            | CONTROL MS            | MAY 2017    | FARMLAND  |                       |              |                   |                   |                   |                   |                   |
| 500                                                                                                            | CONTROL MS            | MAY 2017    | FARMLAND  | 0                     | 120500000    | 0                 | 0                 | 0                 | 0                 | 1380              |
| 574                                                                                                            | CONTROL MS            | MAY 2017    | FARMLAND  | 0                     | 232000000    | 0                 | <MDL <sup>1</sup> | 0                 | 0                 | 2040              |
| 316                                                                                                            | BLUEBERRY MS          | MAY 2017    | FARMLAND  | 0                     | 308500000    | 0                 | 0                 | 122500            | 0                 | 213               |
| 361                                                                                                            | BLUEBERRY MS          | MAY 2017    | FARMLAND  | 0                     | 69000000     | 2070              | <MDL <sup>1</sup> | 0                 | 0                 | 6050              |
| 469                                                                                                            | BLUEBERRY MS          | MAY 2017    | FARMLAND  | 0                     | 107000000    | 0                 | <MDL <sup>1</sup> | 6350              | 0                 | 278               |
| 582                                                                                                            | BLUEBERRY MS          | MAY 2017    | FARMLAND  | 0                     | 328500000    | 0                 | 0                 | 0                 | 0                 | 180               |
| 596                                                                                                            | BLUEBERRY MS          | MAY 2017    | FARMLAND  | 0                     | 2100000000   | 0                 | 0                 | 0                 | 0                 | 91500             |
| 485                                                                                                            | CRANBERRY MS          | MAY 2017    | FARMLAND  |                       |              |                   |                   |                   |                   |                   |
| 492                                                                                                            | CRANBERRY MS          | MAY 2017    | FARMLAND  |                       |              |                   |                   |                   |                   |                   |
| 573                                                                                                            | CRANBERRY MS          | MAY 2017    | FARMLAND  | <MDL <sup>1</sup>     | 1110000000   | 0                 | <MDL <sup>1</sup> | 0                 | 0                 | 2500000000        |
| 578                                                                                                            | CRANBERRY MS          | MAY 2017    | FARMLAND  | 0                     | 95000000     | 0                 | 0                 | 0                 | 0                 | 288               |
| 587                                                                                                            | CRANBERRY MS          | MAY 2017    | FARMLAND  |                       |              |                   |                   |                   |                   |                   |
| 200                                                                                                            | DOUBLE MS             | MAY 2017    | FARMLAND  |                       |              |                   |                   |                   |                   |                   |
| 488                                                                                                            | DOUBLE MS             | MAY 2017    | FARMLAND  | 0                     | 1275000000   | 0                 | 0                 | 0                 | 0                 | 900               |
| 516                                                                                                            | DOUBLE MS             | MAY 2017    | FARMLAND  | 0                     | 112000000    | 0                 | <MDL <sup>1</sup> | 0                 | 0                 | 515000            |
| 546                                                                                                            | DOUBLE MS             | MAY 2017    | FARMLAND  | 0                     | 94000000     | <MDL <sup>1</sup> | <MDL <sup>1</sup> | 0                 | 0                 | 1540              |
| 598                                                                                                            | DOUBLE MS             | MAY 2017    | FARMLAND  | 0                     | 13700000000  | 0                 | 0                 | 11050             | 2055              | 4040000000        |
| <sup>1</sup> <MDL> indicates the number of virus copies was below the minimum detection limit but was positive |                       |             |           |                       |              |                   |                   |                   |                   |                   |
