# Supplementary material for: The impact of lowbush blueberry (Vaccinium angustifolium Ait.) and cranberry (Vaccinium macrocarpon Ait.) pollination on honey bee (Apis mellifera L.) colony health status
Source: PubMed Central journal article supplement (PMC6980599; doi:10.1371/journal.pone.0227970), 2020-01-24
Supplement: pone.0227970.s005.pdf [file pone.0227970.s005.pdf]

| BEEHIVE# | MANAGEMENT STRATEGIES | TIME        | APIARY    | VIRUSES IN FORAGER BEES |                   |                   |                   |                   |                   |              |
|----------|-----------------------|-------------|-----------|-------------------------|-------------------|-------------------|-------------------|-------------------|-------------------|--------------|
|          |                       |             |           | ABPV                    | BQCV              | CBPV              | DWV               | IAPV              | KBV               | SBV          |
| 206      | CONTROL MS            | MAY 2016    | FARMLAND  | 0                       | 2789355065        | 11137255          | <MDL <sup>1</sup> | 4481              | 0                 | 72017        |
| 221      | CONTROL MS            | MAY 2016    | FARMLAND  | 0                       | 5735083310        | 0                 | 0                 | 117631            | <MDL <sup>1</sup> | 40098        |
| 378      | CONTROL MS            | MAY 2016    | FARMLAND  | 0                       | 986250330         | 0                 | 0                 | 491               | 0                 | 599          |
| 500      | CONTROL MS            | MAY 2016    | FARMLAND  | 0                       | 1856036433        | <MDL <sup>1</sup> | 0                 | 3463              | 0                 | 312          |
| 574      | CONTROL MS            | MAY 2016    | FARMLAND  | 0                       | 653853097         | 0                 | 0                 | 0                 | 0                 | 0            |
| 316      | BLUEBERRY MS          | MAY 2016    | FARMLAND  | 0                       | 1772457739        | 4630              | 0                 | 1172058           | 0                 | 15020        |
| 361      | BLUEBERRY MS          | MAY 2016    | FARMLAND  | 0                       | 9346916310        | <MDL <sup>1</sup> | 0                 | 15256             | <MDL <sup>1</sup> | 9990         |
| 469      | BLUEBERRY MS          | MAY 2016    | FARMLAND  | 0                       | 7203109875        | 0                 | 0                 | 50504             | <MDL <sup>1</sup> | 7750         |
| 582      | BLUEBERRY MS          | MAY 2016    | FARMLAND  | 0                       | 629494437         | 0                 | 0                 | 0                 | 0                 | 8015         |
| 596      | BLUEBERRY MS          | MAY 2016    | FARMLAND  | 0                       | 1823274771        | 824               | 0                 | 342552366200      | 45744             | <MDL1        |
| 485      | CRANBERRY MS          | MAY 2016    | FARMLAND  | 0                       | 561732851         | 0                 | 0                 | 0                 | 0                 | 1348         |
| 492      | CRANBERRY MS          | MAY 2016    | FARMLAND  | 0                       | 29488286920       | 0                 | 0                 | 0                 | <MDL <sup>1</sup> | 425          |
| 573      | CRANBERRY MS          | MAY 2016    | FARMLAND  | 0                       | 9488913120        | 0                 | 0                 | 0                 | 0                 | 183          |
| 578      | CRANBERRY MS          | MAY 2016    | FARMLAND  | 0                       | 925991543         | 154067            | 0                 | 0                 | 0                 | 32211        |
| 587      | CRANBERRY MS          | MAY 2016    | FARMLAND  | 0                       | 594146076         | 0                 | 0                 | 0                 | 0                 | 2145         |
| 200      | DOUBLE MS             | MAY 2016    | FARMLAND  | 0                       | 1111245238        | 0                 | <MDL <sup>1</sup> | 0                 | 0                 | <MDL1        |
| 488      | DOUBLE MS             | MAY 2016    | FARMLAND  | 0                       | 4684792057        | <MDL <sup>1</sup> | <MDL <sup>1</sup> | 26012485          | 122593            | 2141         |
| 516      | DOUBLE MS             | MAY 2016    | FARMLAND  | 0                       | 1244504362        | 0                 | 0                 | 4746              | 0                 | 15763881     |
| 546      | DOUBLE MS             | MAY 2016    | FARMLAND  | 0                       | 6240281590        | <MDL <sup>1</sup> | 0                 | 1247661           | 93175             | 203077       |
| 598      | DOUBLE MS             | MAY 2016    | FARMLAND  | 0                       | 326605715         | 494               | 0                 | 0                 | 0                 | 15102        |
| 206      | CONTROL MS            | JUNE 2016   | FARMLAND  | 0                       | 46700289595       | 0                 | 0                 | 4117287           | 3285103           | 22731        |
| 221      | CONTROL MS            | JUNE 2016   | FARMLAND  | 0                       | 1376226451        | 0                 | 0                 | 4121              | 0                 | 111901921    |
| 378      | CONTROL MS            | JUNE 2016   | FARMLAND  | 0                       | 208250483         | 0                 | <MDL <sup>1</sup> | 1890207910000     | 18332374870       | 70755        |
| 500      | CONTROL MS            | JUNE 2016   | FARMLAND  | 0                       | 68242626          | 0                 | 0                 | 1524              | 0                 | 5298         |
| 574      | CONTROL MS            | JUNE 2016   | FARMLAND  | 0                       | 938564492         | 0                 | 0                 | 6254664           | 181702            | 7879         |
| 316      | BLUEBERRY MS          | JUNE 2016   | BLUEBERRY | 0                       | 96292380800       | 0                 | 0                 | 50531             | 26090             | 5626130335   |
| 361      | BLUEBERRY MS          | JUNE 2016   | BLUEBERRY | 0                       | 16578490115       | 0                 | 0                 | 3063997675        | 362183            | 439279       |
| 469      | BLUEBERRY MS          | JUNE 2016   | BLUEBERRY | 0                       | 926766445         | <MDL <sup>1</sup> | 0                 | 795940297         | 0                 | 1806652      |
| 582      | BLUEBERRY MS          | JUNE 2016   | BLUEBERRY | 0                       | 770791295         | 0                 | 0                 | 0                 | 0                 | 4176885      |
| 596      | BLUEBERRY MS          | JUNE 2016   | BLUEBERRY | 0                       | 41040238850       | 0                 | 0                 | 8053              | 0                 | 117646       |
| 485      | CRANBERRY MS          | JUNE 2016   | FARMLAND  | 0                       | 155495618         | 0                 | 0                 | 1187371           | 3191              | 265754       |
| 492      | CRANBERRY MS          | JUNE 2016   | FARMLAND  | 0                       | 18590388760       | 0                 | 0                 | 1623797           | 41442             | 28254        |
| 573      | CRANBERRY MS          | JUNE 2016   | FARMLAND  | 0                       | 201061078         | 0                 | 0                 | 8706479           | <MDL <sup>1</sup> | 151303       |
| 578      | CRANBERRY MS          | JUNE 2016   | FARMLAND  | 0                       | 208170240         | 0                 | 0                 | 0                 | 0                 | 6584         |
| 587      | CRANBERRY MS          | JUNE 2016   | FARMLAND  | 0                       | 17732988260       | 5291              | 35175             | 1298635649000     | 2591852           | 644823       |
| 200      | DOUBLE MS             | JUNE 2016   | BLUEBERRY | 0                       | 12513475710       | 0                 | 0                 | 304793            | 24308             | 73935        |
| 488      | DOUBLE MS             | JUNE 2016   | BLUEBERRY | 0                       | 2776136299        | 0                 | 0                 | 48528215300       | 100664198         | 61376        |
| 516      | DOUBLE MS             | JUNE 2016   | BLUEBERRY | 0                       | 633318139         | 0                 | <MDL <sup>1</sup> | 10193993          | 1994448           | 1718395176   |
| 546      | DOUBLE MS             | JUNE 2016   | BLUEBERRY | 0                       | 83380279300       | 0                 | <MDL <sup>1</sup> | 83361967          | <MDL <sup>1</sup> | 873575       |
| 598      | DOUBLE MS             | JUNE 2016   | BLUEBERRY | 0                       | 55096907700       | 0                 | 0                 | 15098             | 0                 | 25329876265  |
| 206      | CONTROL MS            | JULY 2016   | FARMLAND  | 0                       | 15045583080       | 84688             | 0                 | 618543444         | 59643153          | 6845998480   |
| 221      | CONTROL MS            | JULY 2016   | FARMLAND  | 400                     | 13719527945       | 526074            | 0                 | 3233387266        | 1664889411        | 3319053      |
| 378      | CONTROL MS            | JULY 2016   | FARMLAND  | 0                       | 301522312         | 13062             | 0                 | 259793510         | 1289428           | 6654574      |
| 500      | CONTROL MS            | JULY 2016   | FARMLAND  | 0                       | 260092067         | 22165             | 0                 | 6658              | 0                 | 19365        |
| 574      | CONTROL MS            | JULY 2016   | FARMLAND  | 0                       | 1331334731        | 0                 | <MDL <sup>1</sup> | 71052814200       | 1348448732        | 5684         |
| 316      | BLUEBERRY MS          | JULY 2016   | FARMLAND  | 0                       | 164988925650      | 4274              | 0                 | 8008              | 0                 | 22228        |
| 361      | BLUEBERRY MS          | JULY 2016   | FARMLAND  | 0                       | 499312312         | <MDL <sup>1</sup> | 0                 | 0                 | 0                 | 873853       |
| 469      | BLUEBERRY MS          | JULY 2016   | FARMLAND  | 0                       | 7385646430        | 42722             | 0                 | 0                 | 0                 | 161060       |
| 582      | BLUEBERRY MS          | JULY 2016   | FARMLAND  | <MDL <sup>1</sup>       | 3092231958        | 420               | 0                 | 0                 | 0                 | 4322444      |
| 596      | BLUEBERRY MS          | JULY 2016   | FARMLAND  | 0                       | 4137020162        | 0                 | 0                 | <MDL <sup>1</sup> | 0                 | 885977528    |
| 485      | CRANBERRY MS          | JULY 2016   | CRANBERRY | 0                       | 46642633705       | 0                 | 0                 | 4439              | 0                 | 117255       |
| 492      | CRANBERRY MS          | JULY 2016   | CRANBERRY | 0                       | 852954682         | <MDL <sup>1</sup> | 0                 | 11021             | 0                 | 1211695      |
| 573      | CRANBERRY MS          | JULY 2016   | CRANBERRY | 0                       | 259067364         | 0                 | 31535             | 0                 | 0                 | 510167       |
| 578      | CRANBERRY MS          | JULY 2016   | CRANBERRY | 0                       | 36942752030       | <MDL <sup>1</sup> | 0                 | <MDL <sup>1</sup> | <MDL <sup>1</sup> | 690924       |
| 587      | CRANBERRY MS          | JULY 2016   | CRANBERRY | 0                       | 1190248448        | 0                 | 0                 | 652295622         | 7404              | 670243       |
| 200      | DOUBLE MS             | JULY 2016   | CRANBERRY | 0                       | 1135435127        | 367               | 0                 | 119463            | 0                 | 169692       |
| 488      | DOUBLE MS             | JULY 2016   | CRANBERRY | 0                       | 520540455         | 0                 | 0                 | 53980             | 9948              | 548006       |
| 516      | DOUBLE MS             | JULY 2016   | CRANBERRY | 0                       | 18130271535       | 17709             | 0                 | 3709119           | 324729            | 383907       |
| 546      | DOUBLE MS             | JULY 2016   | CRANBERRY | 0                       | 3625412469        | 0                 | 0                 | 54902             | <MDL <sup>1</sup> | 10031074     |
| 598      | DOUBLE MS             | JULY 2016   | CRANBERRY | 0                       | 82537365900       | 32388             | 11394784          | 40859             | <MDL <sup>1</sup> | 22581478940  |
| 206      | CONTROL MS            | AUGUST 2016 | FARMLAND  | 0                       | 197622962         | 0                 | 0                 | 3586063046        | 340744989         | 1321272      |
| 221      | CONTROL MS            | AUGUST 2016 | FARMLAND  | 0                       | 820332380         | 4027420           | 0                 | 0                 | 0                 | 5731890      |
| 378      | CONTROL MS            | AUGUST 2016 | FARMLAND  | 0                       | 21230396          | 873520            | 0                 | <MDL <sup>1</sup> | 0                 | 8619         |
| 500      | CONTROL MS            | AUGUST 2016 | FARMLAND  | 0                       | 24694670          | <MDL <sup>1</sup> | 0                 | 0                 | 0                 | 12505        |
| 574      | CONTROL MS            | AUGUST 2016 | FARMLAND  | 0                       | 121325589         | 0                 | 0                 | 0                 | 0                 | 10346        |
| 316      | BLUEBERRY MS          | AUGUST 2016 | FARMLAND  | 0                       | 861214104000      | 0                 | 0                 | 0                 | 0                 | 6081671585   |
| 361      | BLUEBERRY MS          | AUGUST 2016 | FARMLAND  | 0                       | 45222804          | 0                 | <MDL <sup>1</sup> | 857733            | 0                 | 653504141    |
| 469      | BLUEBERRY MS          | AUGUST 2016 | FARMLAND  | 0                       | 128014211         | 49044             | 0                 | <MDL <sup>1</sup> | 0                 | 193702       |
| 582      | BLUEBERRY MS          | AUGUST 2016 | FARMLAND  | 0                       | 71926343750       | 0                 | 0                 | 0                 | 0                 | 2289737221   |
| 596      | BLUEBERRY MS          | AUGUST 2016 | FARMLAND  | 0                       | 1388502122        | 0                 | 0                 | 0                 | 0                 | 936725007    |
| 485      | CRANBERRY MS          | AUGUST 2016 | FARMLAND  | 0                       | 73151279          | <MDL <sup>1</sup> | 0                 | 0                 | 0                 | 2351946      |
| 492      | CRANBERRY MS          | AUGUST 2016 | FARMLAND  | 0                       | 159989770         | 0                 | 0                 | 1249765868        | 21021552          | 17006525620  |
| 573      | CRANBERRY MS          | AUGUST 2016 | FARMLAND  | 0                       | 586163604         | 1023              | 0                 | 64152             | 0                 | 607135       |
| 578      | CRANBERRY MS          | AUGUST 2016 | FARMLAND  | 0                       | 49076088250       | 2392785           | 0                 | 4956639           | <MDL <sup>1</sup> | 13220360140  |
| 587      | CRANBERRY MS          | AUGUST 2016 | FARMLAND  | 0                       | 30432286590       | 497099077         | 0                 | 16065             | 0                 | 1451985      |
| 200      | DOUBLE MS             | AUGUST 2016 | FARMLAND  | 0                       | 383470903         | <MDL <sup>1</sup> | 0                 | 5299              | 0                 | 44963        |
| 488      | DOUBLE MS             | AUGUST 2016 | FARMLAND  | 0                       | <MDL <sup>1</sup> | <MDL <sup>1</sup> | 0                 | 135361            | 0                 | <MDL1        |
| 516      | DOUBLE MS             | AUGUST 2016 | FARMLAND  | 0                       | 292383700800      | 0                 | 0                 | 20463743335000    | 2433100127        | 2732474849   |
| 546      | DOUBLE MS             | AUGUST 2016 | FARMLAND  | 0                       | 152132071         | <MDL <sup>1</sup> | 0                 | 3978              | 0                 | 37231        |
| 598      | DOUBLE MS             | AUGUST 2016 | FARMLAND  | 0                       | 23926294480       | 62674             | <MDL <sup>1</sup> | 2968414959        | 0                 | 389375975150 |
| 206      | CONTROL MS            | MAY 2017    | FARMLAND  | 0                       | 8000000000        | 192               | 0                 | 0                 | 0                 | 5550         |
| 221      | CONTROL MS            | MAY 2017    | FARMLAND  | <MDL <sup>1</sup>       | 4430000000000     | 0                 | <MDL <sup>1</sup> | 0                 | 0                 | 2575000      |
| 378      | CONTROL MS            | MAY 2017    | FARMLAND  |                         |                   |                   |                   |                   |                   |              |
| 500      | CONTROL MS            | MAY 2017    | FARMLAND  | 0                       | 263000000000      | <MDL <sup>1</sup> | 0                 | 0                 | 0                 | 44450        |
| 574      | CONTROL MS            | MAY 2017    | FARMLAND  | 0                       | 520000000         | 0                 | 0                 | 0                 | 0                 | 1045000      |
| 316      | BLUEBERRY MS          | MAY 2017    | FARMLAND  | 0                       | 266000000         | 17050000000       | 0                 | 41450             | 0                 | 2110         |
| 361      | BLUEBERRY MS          | MAY 2017    | FARMLAND  | 0                       | 1130000000        | <MDL <sup>1</sup> | 0                 | 0                 | 0                 | 76000        |
| 469      | BLUEBERRY MS          | MAY 2017    | FARMLAND  | 0                       | 273000000         | 0                 | 0                 | 0                 | 0                 | 197          |
| 582      | BLUEBERRY MS          | MAY 2017    | FARMLAND  | 0                       | 1970000000000     | 63500             | 0                 | 5850              | 0                 | 0            |
| 596      | BLUEBERRY MS          | MAY 2017    | FARMLAND  | 0                       | 2420000000        | 0                 | <MDL <sup>1</sup> | 0                 | 0                 | 725          |
| 485      | CRANBERRY MS          | MAY 2017    | FARMLAND  |                         |                   |                   |                   |                   |                   |              |
| 492      | CRANBERRY MS          | MAY 2017    | FARMLAND  |                         |                   |                   |                   |                   |                   |              |
| 573      | CRANBERRY MS          | MAY 2017    | FARMLAND  | <MDL <sup>1</sup>       | 20600000000       | 0                 | <MDL <sup>1</sup> | 0                 | <MDL <sup>1</sup> | 183500       |
| 578      | CRANBERRY MS          | MAY 2017    | FARMLAND  | 0                       | 47800000          | 1030              | 0                 | 0                 | 0                 | 0            |
| 587      | CRANBERRY MS          | MAY 2017    | FARMLAND  |                         |                   |                   |                   |                   |                   |              |
| 200      | DOUBLE MS             | MAY 2017    | FARMLAND  |                         |                   |                   |                   |                   |                   |              |
| 488      | DOUBLE MS             | MAY 2017    | FARMLAND  | 0                       | 7350000000        | 0                 | 0                 | 0                 | 0                 | 0            |
| 516      | DOUBLE MS             | MAY 2017    | FARMLAND  | 0                       | 227500000         | 0                 | 0                 | 0                 | 0                 | 118          |
| 546      | DOUBLE MS             | MAY 2017    | FARMLAND  | 0                       | 213500000         | 0                 | 19100             | 0                 | 0                 | 0            |
| 598      | DOUBLE MS             | MAY 2017    | FARMLAND  | 0                       | 1285000000        | 530               | 0                 | <MDL <sup>1</sup> | 0                 | 218000       |

<sup>1</sup><MDL<sup>1</sup> indicates the number of virus copies was below the <MDLimum detection limit but was positive
