# Supplementary material for: The impact of lowbush blueberry (Vaccinium angustifolium Ait.) and cranberry (Vaccinium macrocarpon Ait.) pollination on honey bee (Apis mellifera L.) colony health status
Source: PubMed Central journal article supplement (PMC6980599; doi:10.1371/journal.pone.0227970), 2020-01-24
Supplement: pone.0227970.s006.pdf [file pone.0227970.s006.pdf]

|           |              | Varroa counting                |                               |                               |                           |
|-----------|--------------|--------------------------------|-------------------------------|-------------------------------|---------------------------|
|           |              | A                              | B                             | C                             | D                         |
| Method    |              | Alcohol washing                | Natural mite fall             | Natural mite fall             | Natural mite fall         |
| Date      |              | June 1 2016<br>(mite/100 bees) | October 27 2016<br>(mite/day) | December 6 2016<br>(mite/day) | June 1 2017<br>(mite/day) |
| Beehive # | MS           |                                |                               |                               |                           |
| 206       | Control MS   | 0.0                            | 1.0                           | 1.8                           | 0.6                       |
| 221       |              | No data <sup>2</sup>           | 1.6                           | 0.3                           | 0.0                       |
| 378       |              | 0.0                            | 3.3                           | 3.0                           | Dead <sup>1</sup>         |
| 500       |              | 0.0                            | 0.0                           | 0.8                           | 0.0                       |
| 574       |              | 0.0                            | 0.4                           | 0.3                           | 0.0                       |
| 316       | Blueberry MS | 0.0                            | 4.4                           | 6.8                           | 0.1                       |
| 361       |              | No data <sup>2</sup>           | 0.1                           | 0.2                           | 0.3                       |
| 469       |              | 0.0                            | 1.7                           | 0.3                           | 0.1                       |
| 582       |              | 0.0                            | 0.4                           | 0.0                           | 0.0                       |
| 596       |              | 0.0                            | 0.1                           | 0.0                           | 0.3                       |
| 485       | Cranberry MS | No data <sup>2</sup>           | 2.0                           | 1.7                           | Dead <sup>1</sup>         |
| 492       |              | No data <sup>2</sup>           | 0.3                           | 0.3                           | Dead <sup>1</sup>         |
| 573       |              | 0.0                            | 0.6                           | 1.0                           | 0.3                       |
| 578       |              | 0.0                            | 0.4                           | 0.3                           | 0.4                       |
| 587       |              | 0.0                            | Dead <sup>1</sup>             | Dead <sup>1</sup>             | Dead <sup>1</sup>         |
| 200       | Double MS    | 0.0                            | 1.3                           | 1.3                           | Dead <sup>1</sup>         |
| 488       |              | 0.0                            | 1.0                           | 1.8                           | 0.1                       |
| 516       |              | 0.0                            | 0.3                           | 0.2                           | 0.1                       |
| 546       |              | 0.0                            | 1.1                           | 2.5                           | 0.3                       |
| 598       |              | 0.0                            | 0.7                           | 0.8                           | 0.6                       |

<sup>1</sup> “Dead” indicates the colony has died over the winter 2016-2017

<sup>2</sup> “No data” indicates the varroa mite counting was not successful
